# Supplementary material for: Single cell transcriptional zonation of human psoriasis skin identifies an alternative immunoregulatory axis conducted by skin resident cells
Source: PubMed Central journal article supplement (PMC8102483; doi:10.1038/s41419-021-03724-6), 2021-05-06

Cluster EpD\_Basbal1

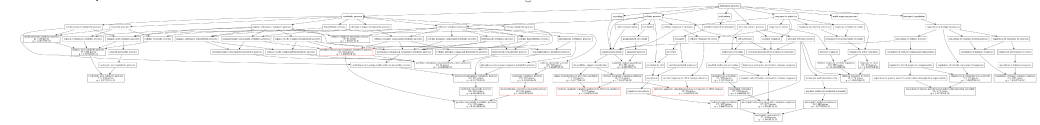

Cluster EpD\_Basbal2

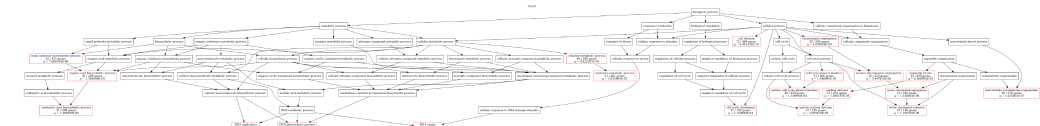

Cluster EpD\_Basbal3

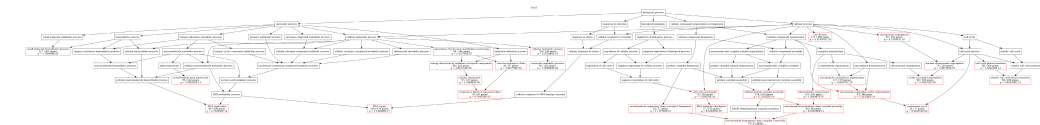

Cluster EpD\_Cor neum

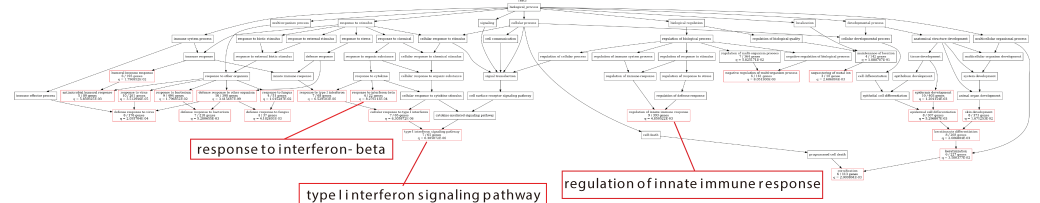

Cluster EpD\_Foli

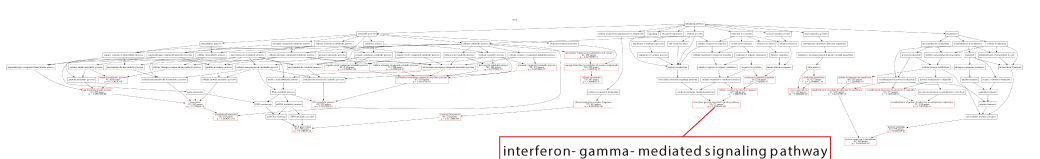

Cluster EpD\_Granular/Spinous

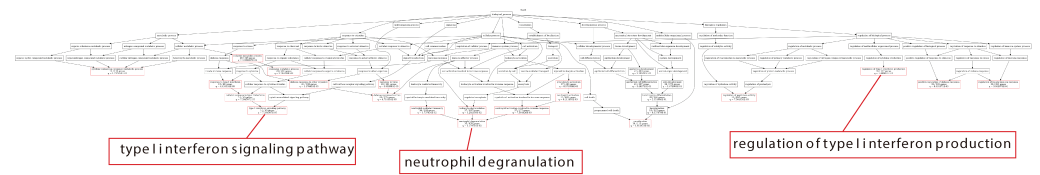

EpD\_Granular

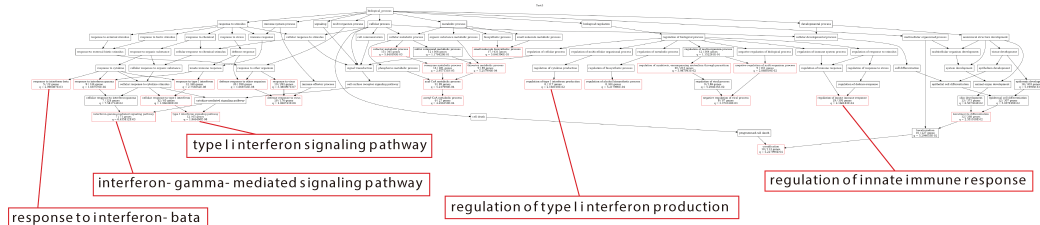

Cluster EpD\_SG

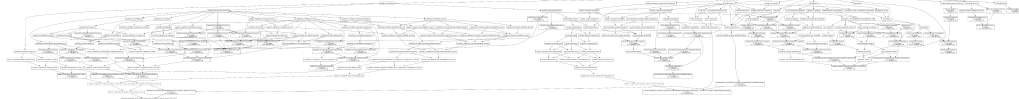

Cluster EpD\_Spinous

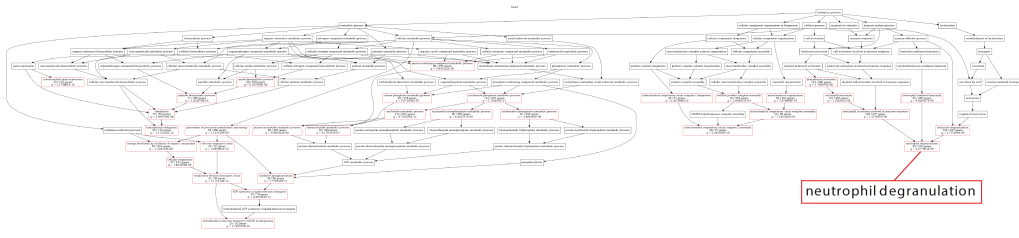

Cluster Mes\_DP/DS1

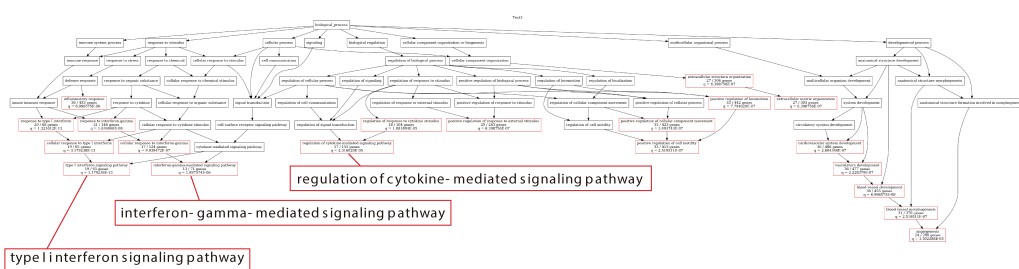

Cluster Mes\_DP/DS2

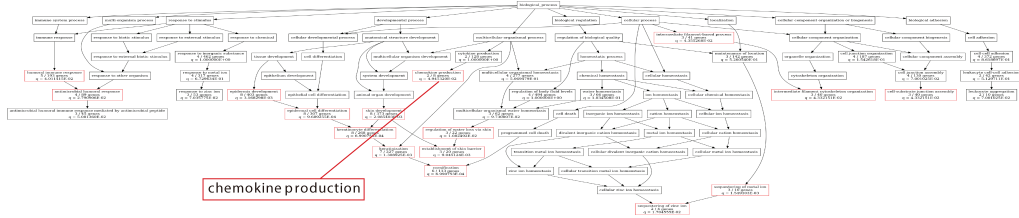

Cluster Mes\_Fibro

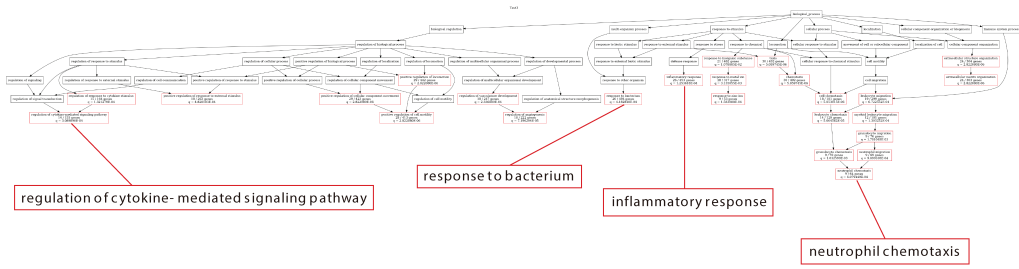

Cluster Mes\_Per1

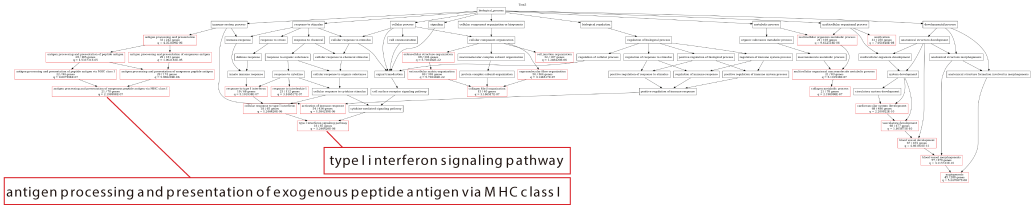

Cluster Mes\_Per2

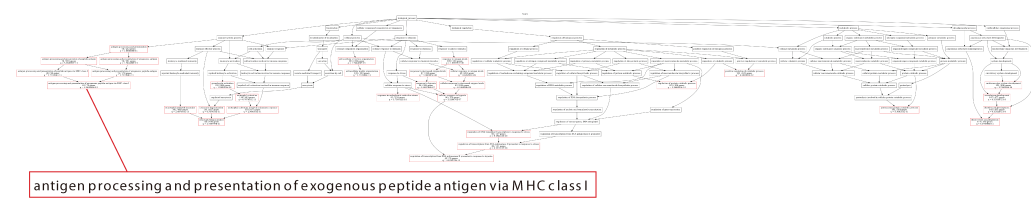

Cluster Mes\_SM

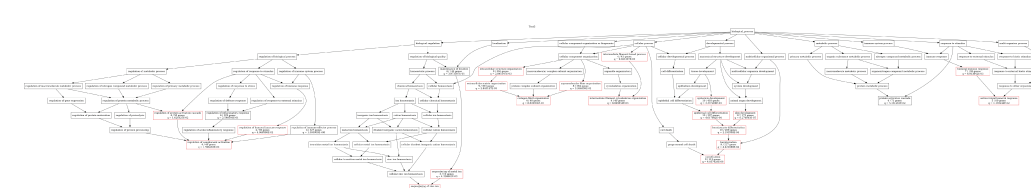

Supplement: 41419_2021_3724_MOESM4_ESM.pdf [file 41419_2021_3724_MOESM4_ESM.pdf]
