# Supplementary material for: Single cell transcriptional zonation of human psoriasis skin identifies an alternative immunoregulatory axis conducted by skin resident cells
Source: PubMed Central journal article supplement (PMC8102483; doi:10.1038/s41419-021-03724-6), 2021-05-06

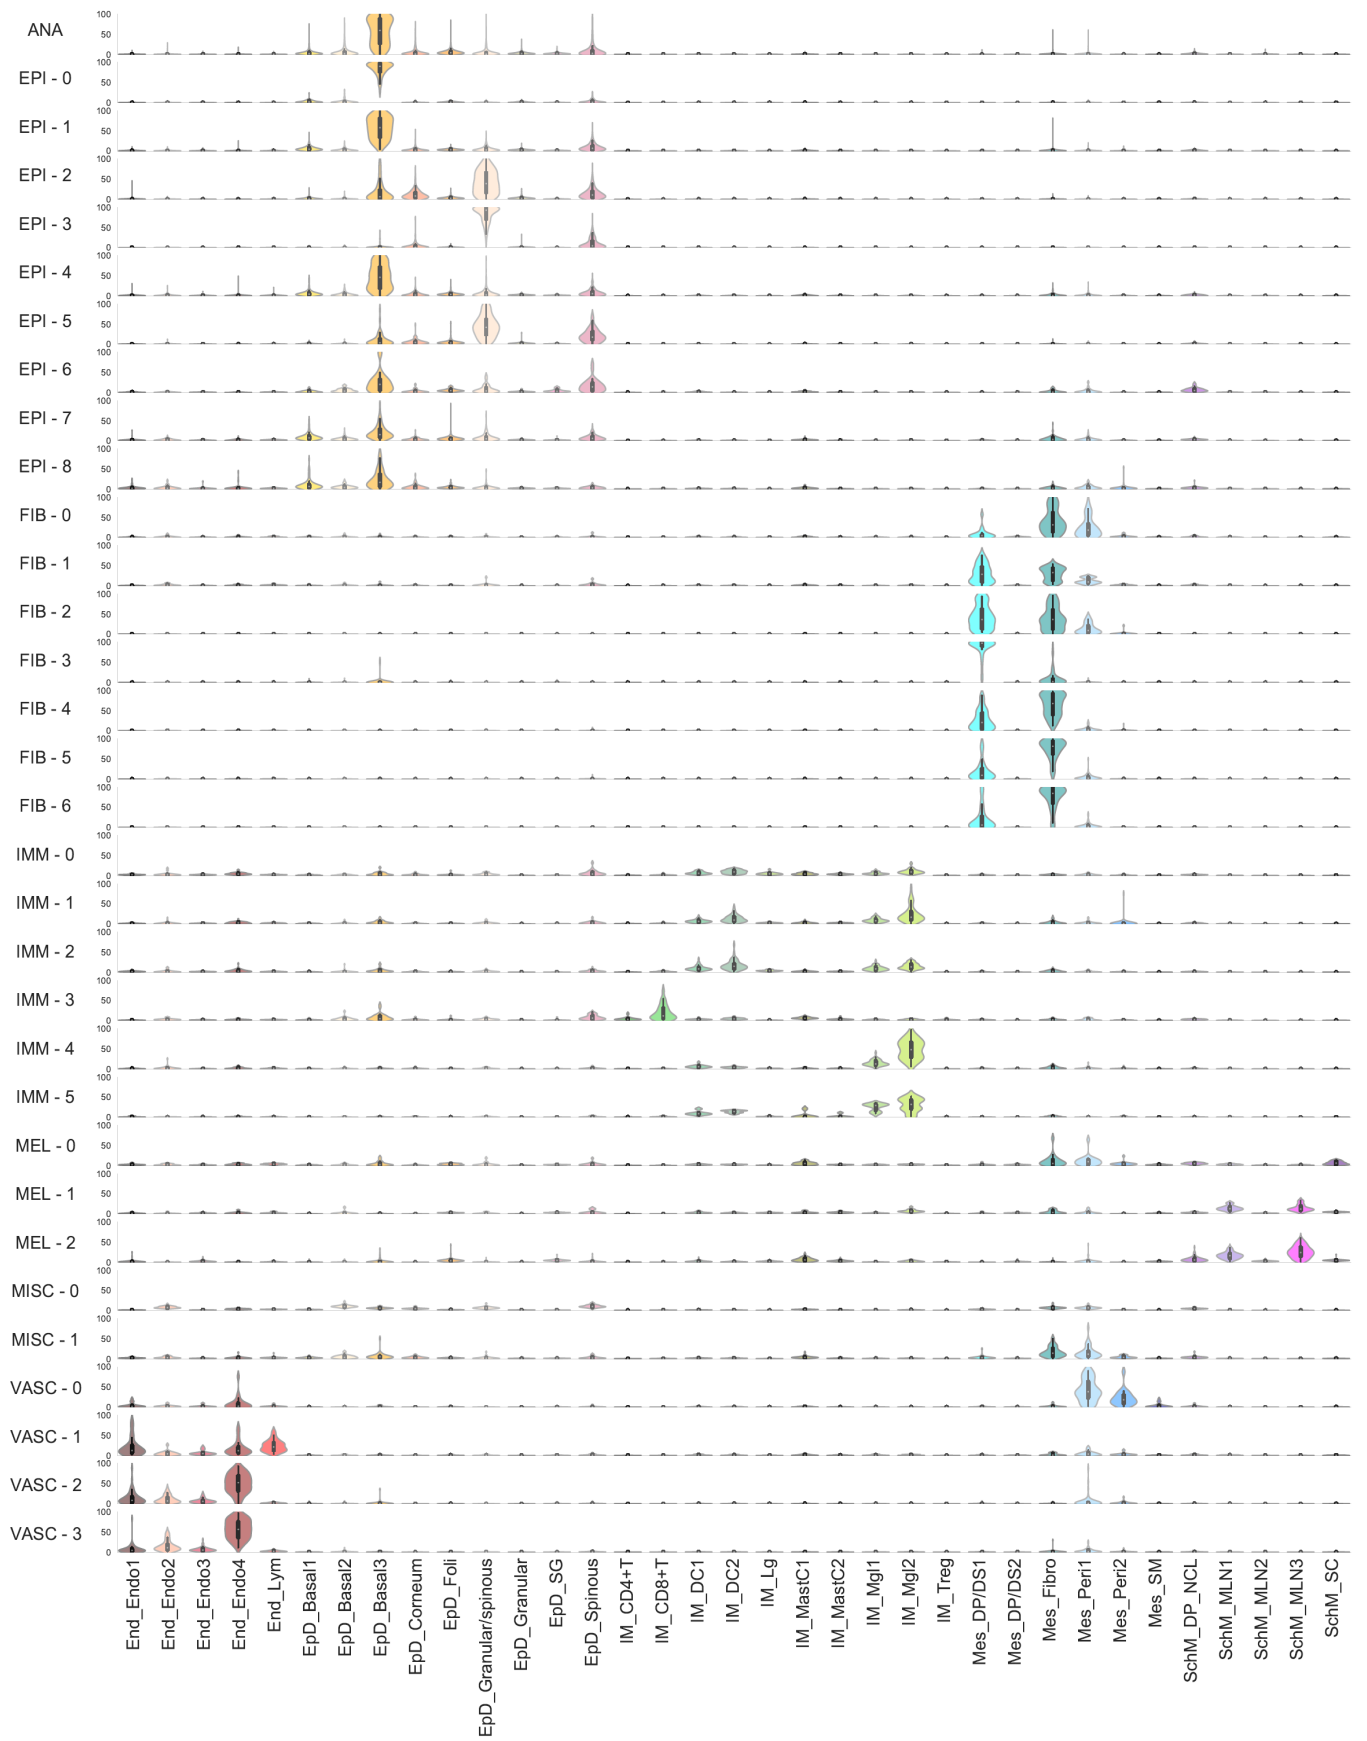

Supplement: 41419_2021_3724_MOESM3_ESM.pdf [file 41419_2021_3724_MOESM3_ESM.pdf]
